# Supplementary figures and images for: Intercellular Molecular Crosstalk Networks within Invasive and Immunosuppressive Tumor Microenvironment Subtypes Associated with Clinical Outcomes in Four Cancer Types
Source: MDPI journal article supplement (doi:10.3390/biomedicines11113057), 2023-11-14

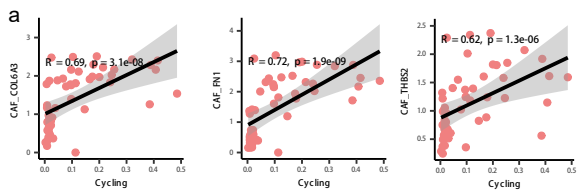

BC

CRC

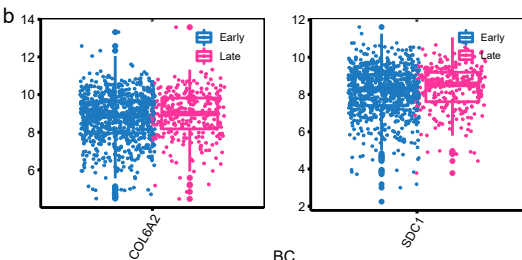

BC

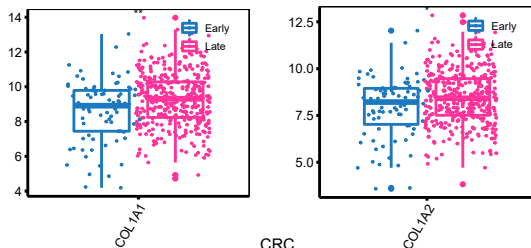

CRC

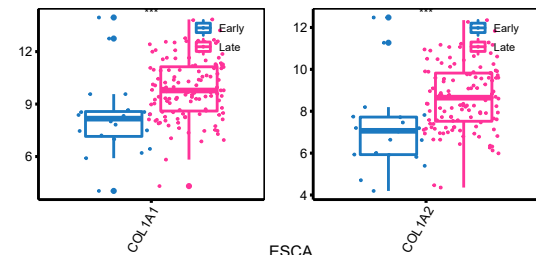

ESCA

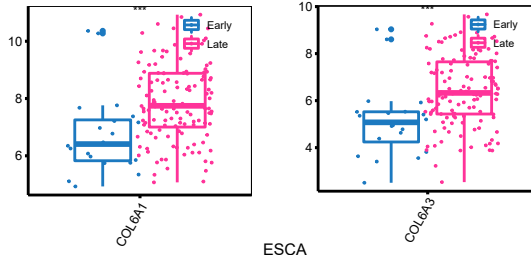

ESCA

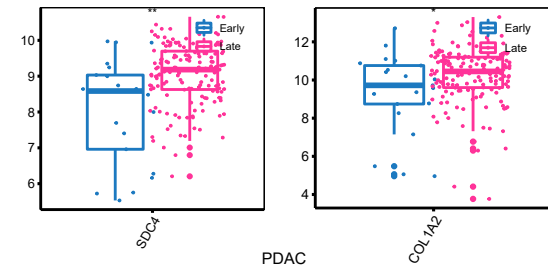

PDAC

Supplement: s1 [file s1]

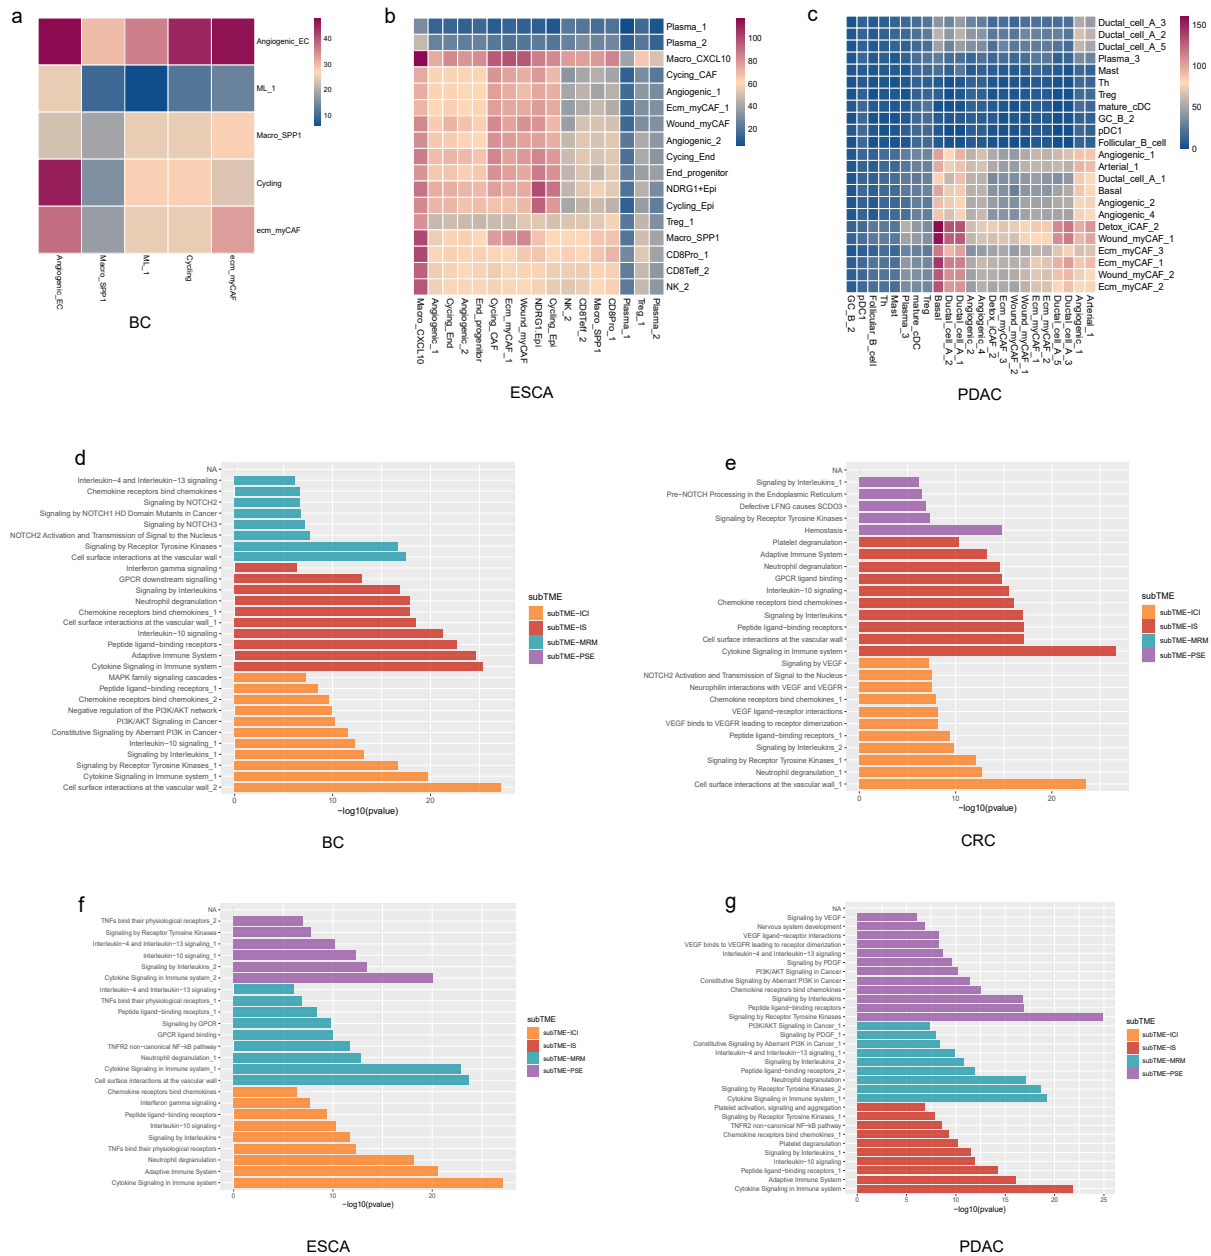

Supplement: s1 [file s1]

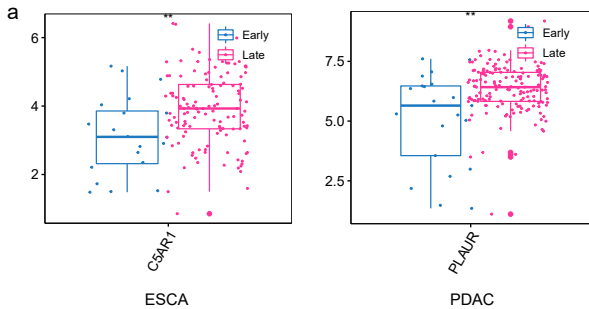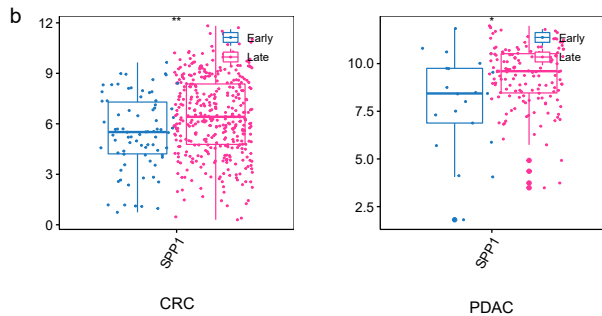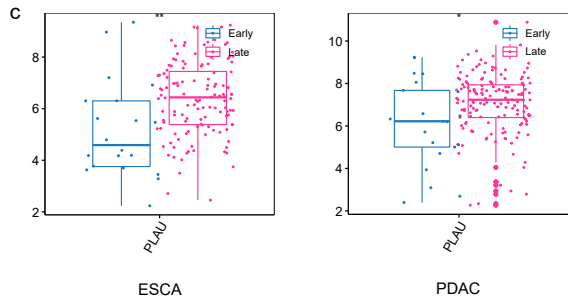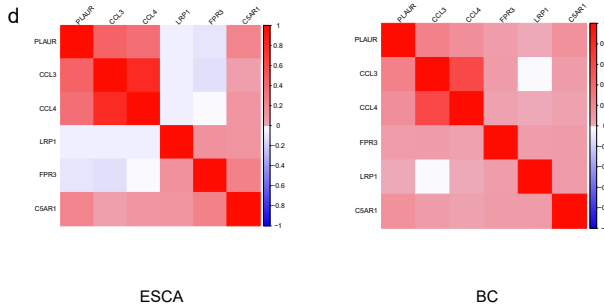

Supplement: s1 [file s1]

a

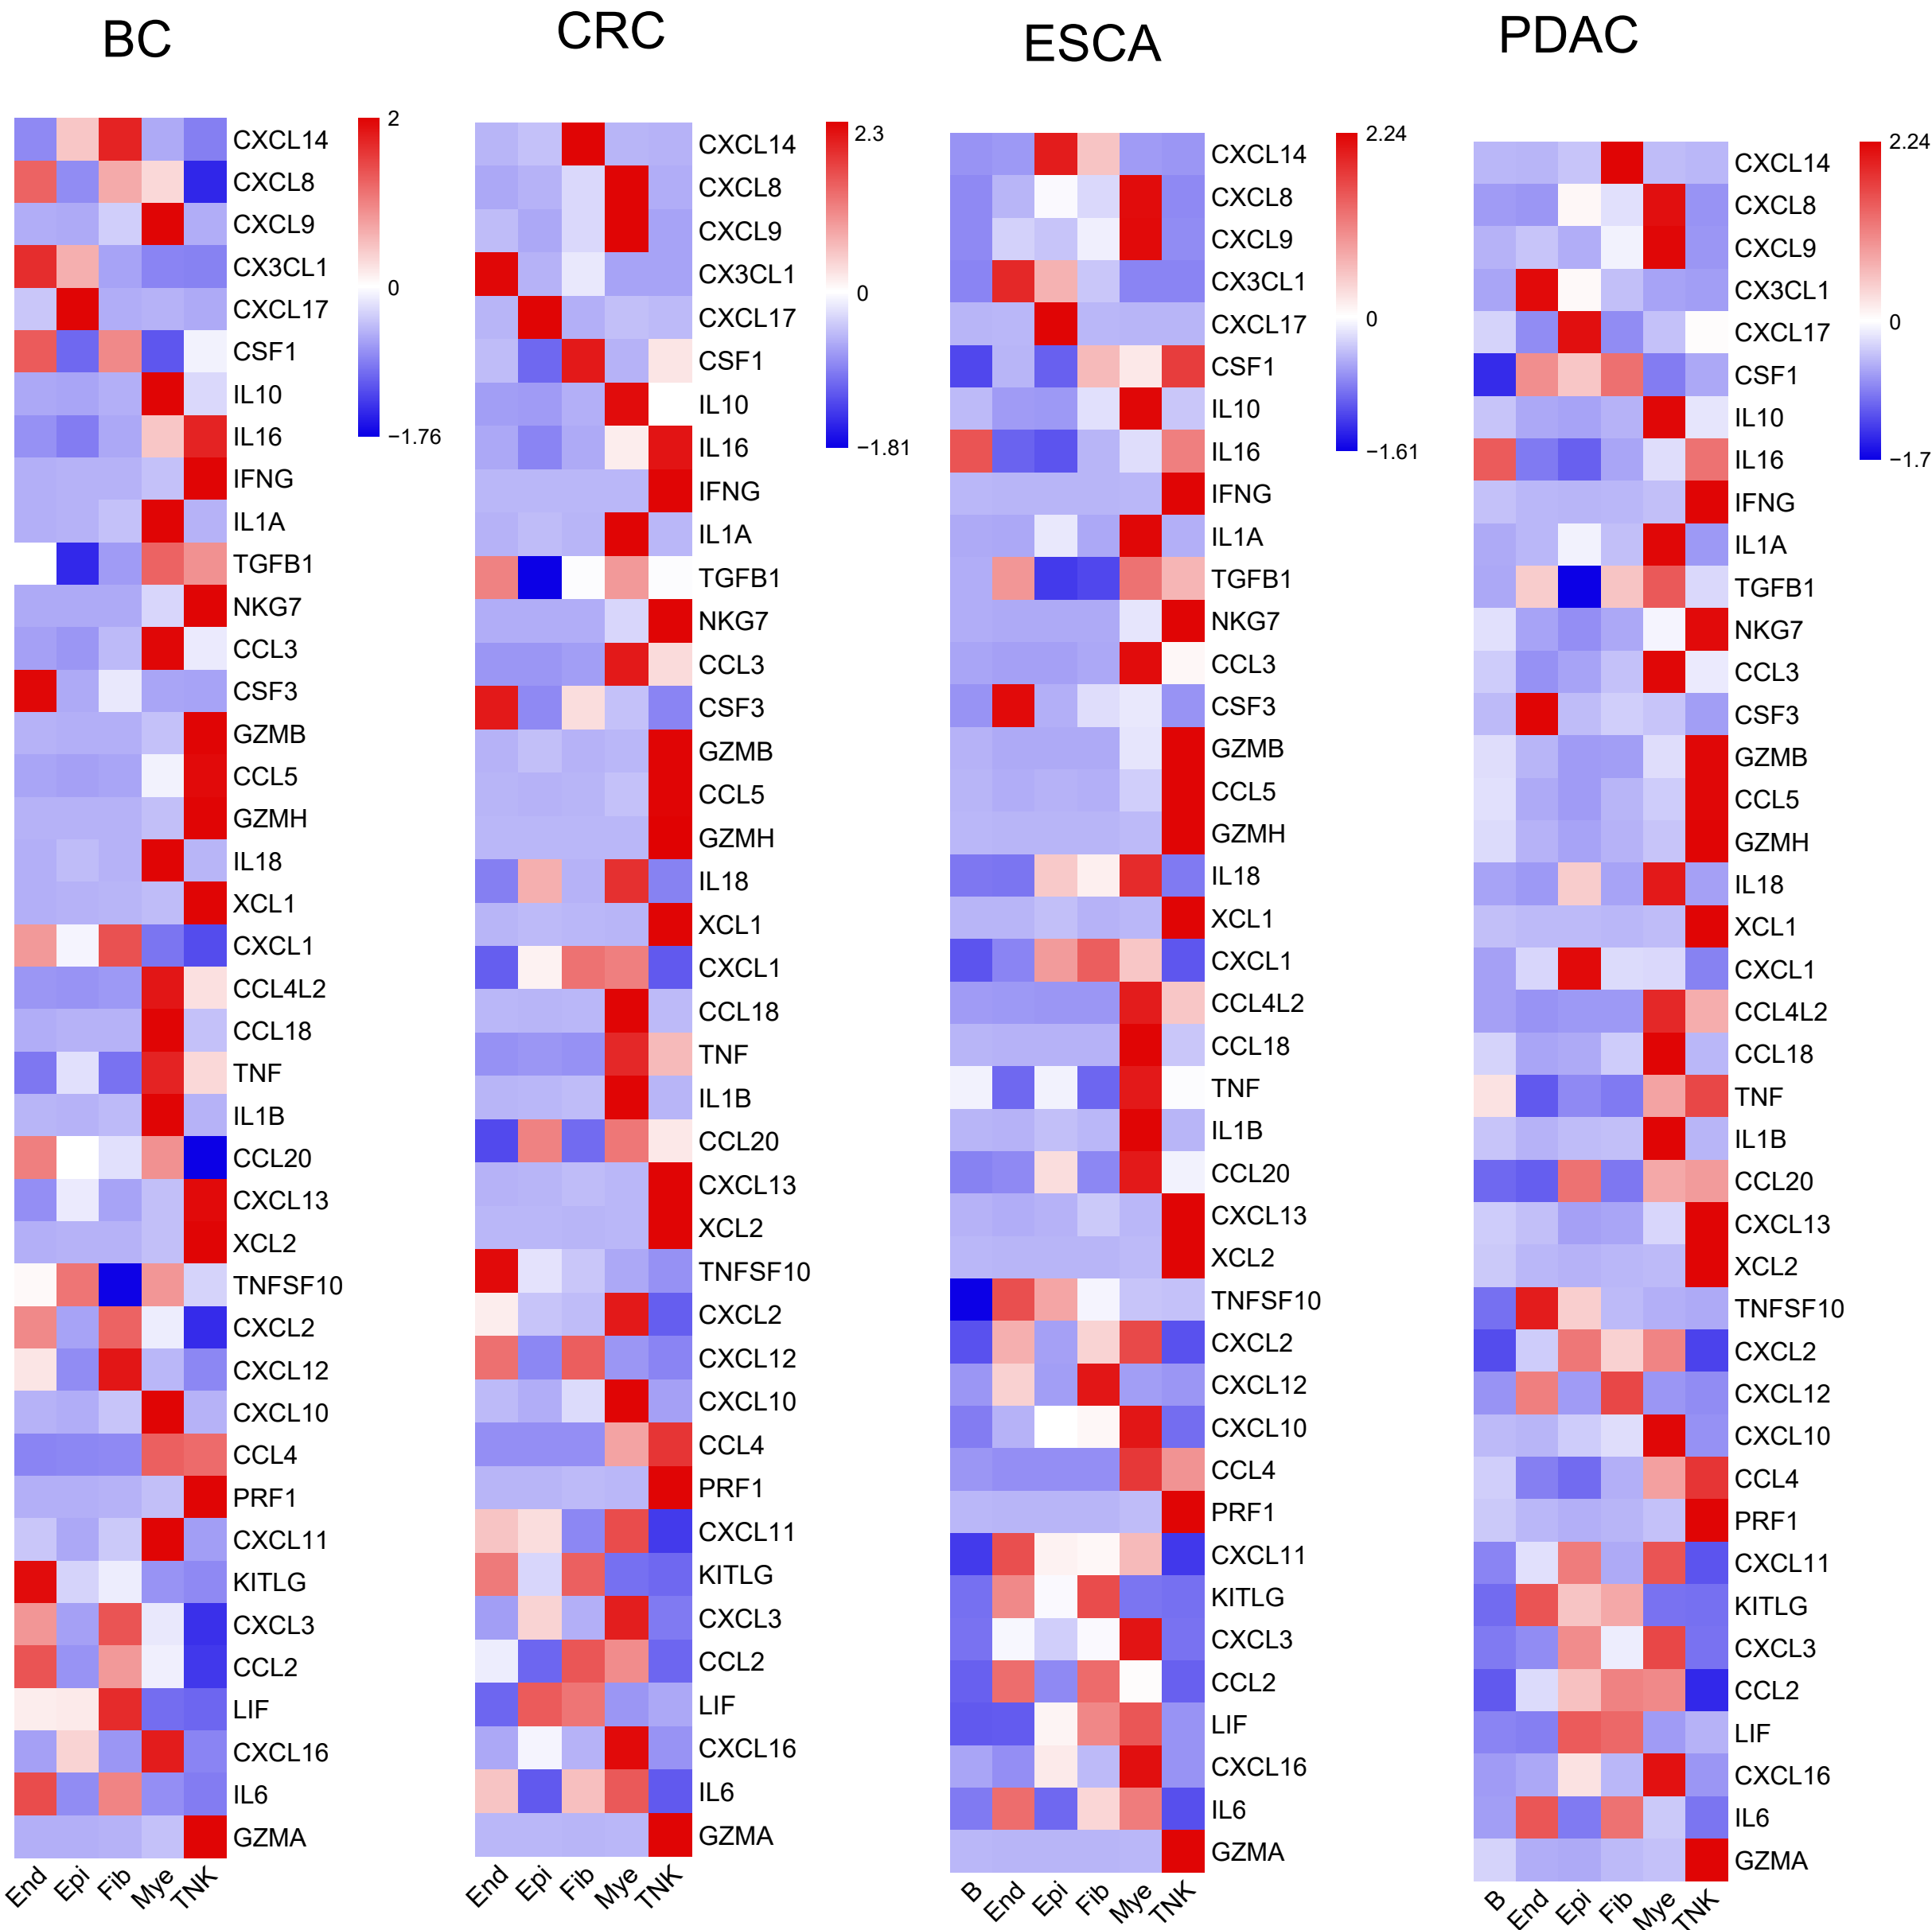

b

BC

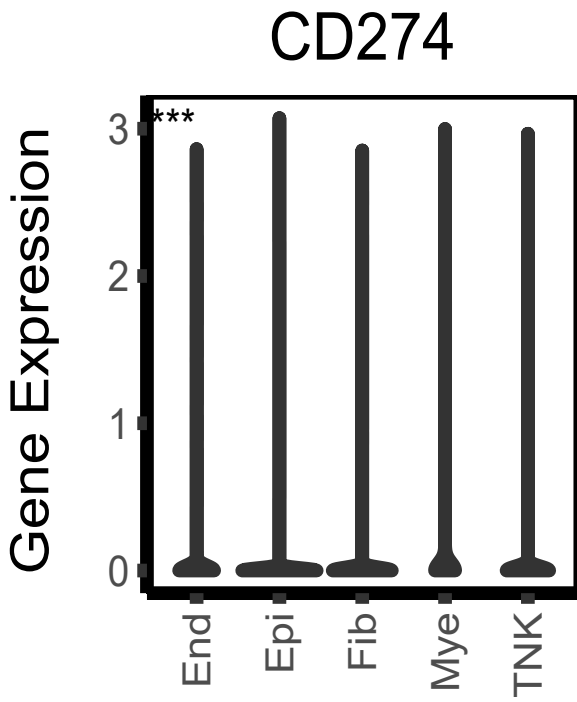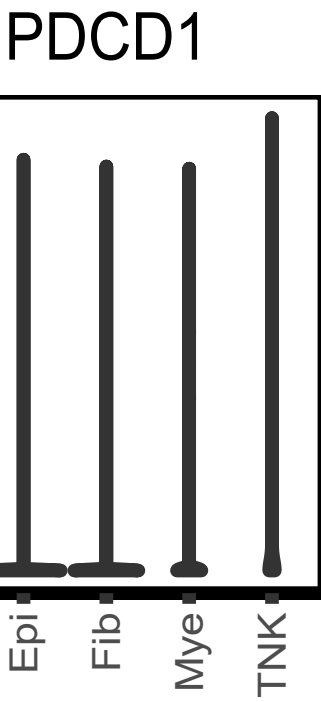

CRC

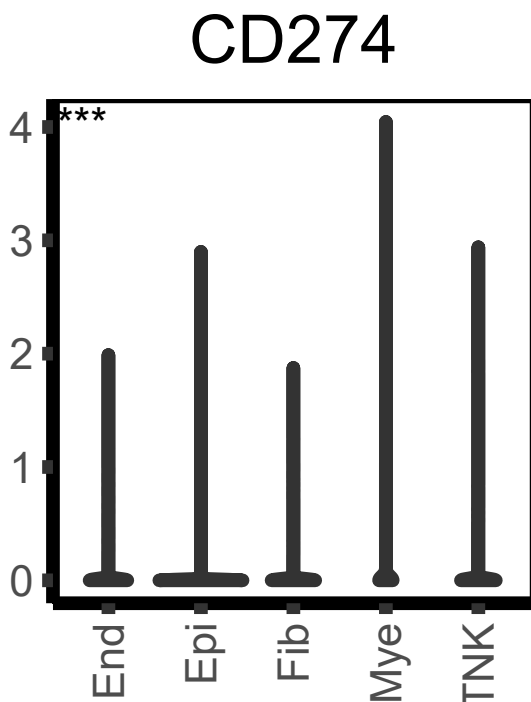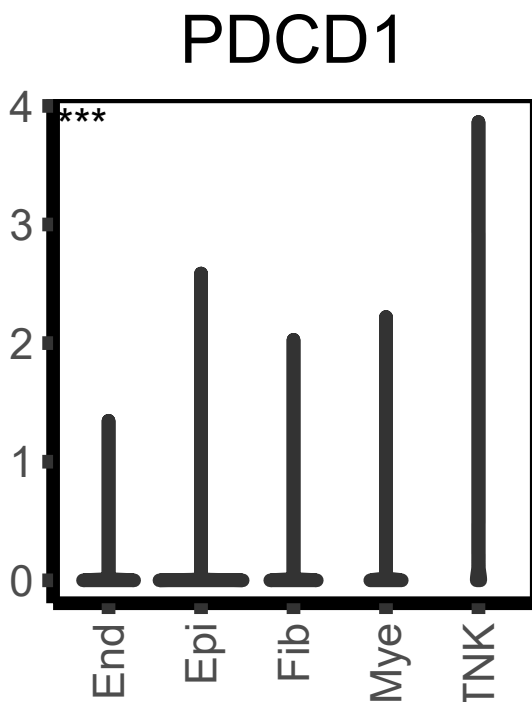

ESCA

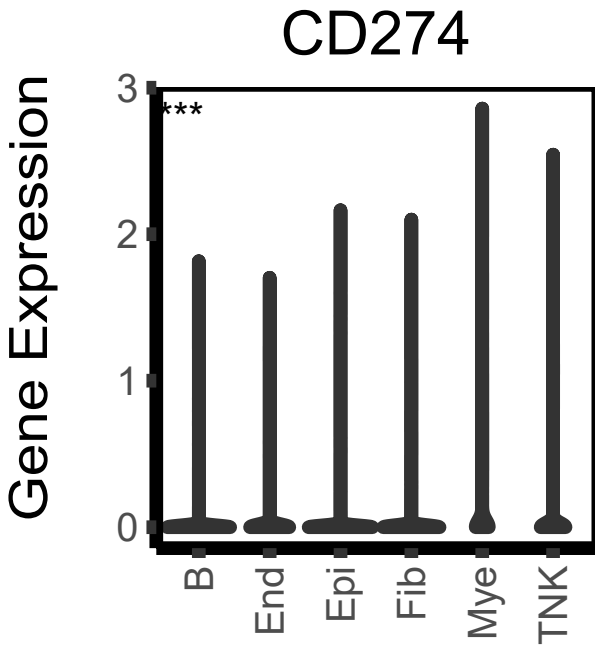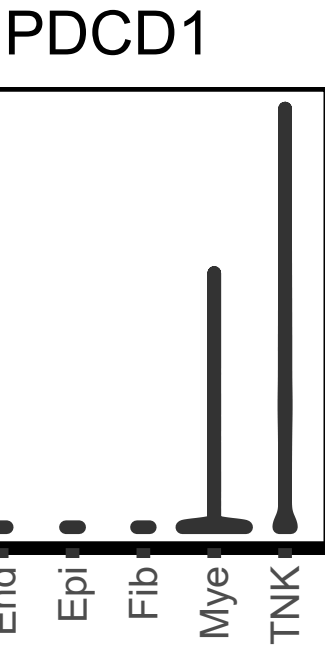

PDAC

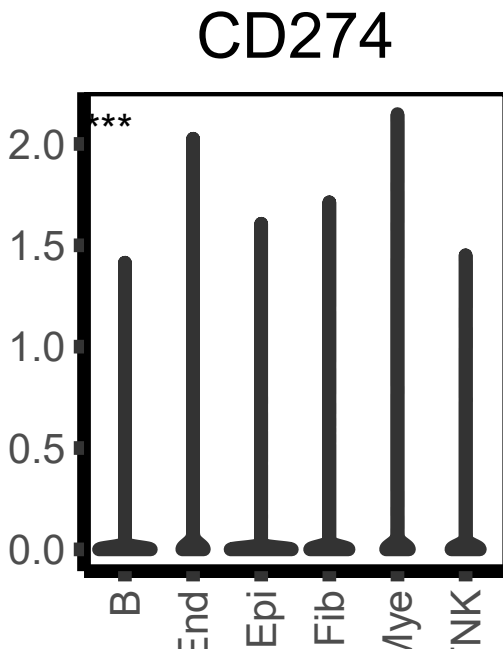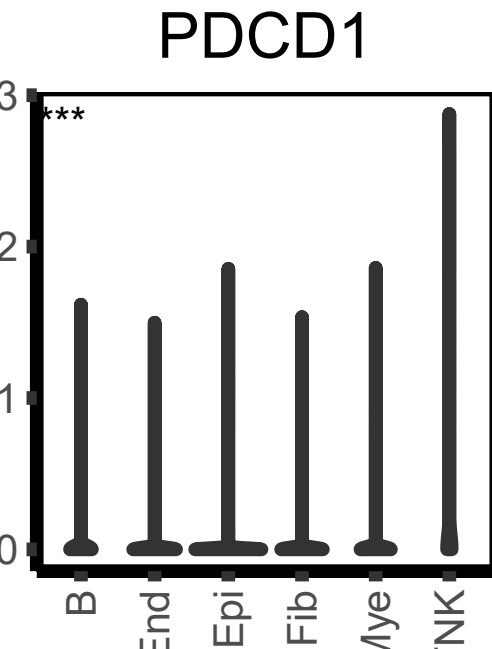

Supplement: s1 [file s1]

a

COL6A1

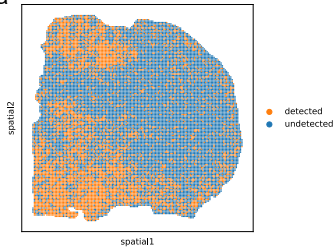

SDC1

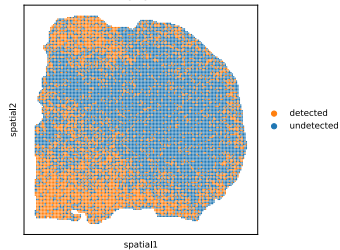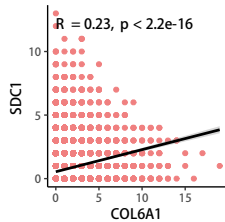

b

COL6A1

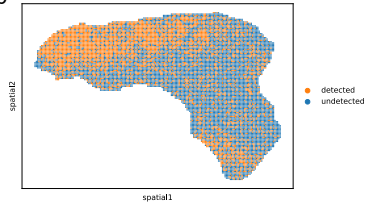

SDC1

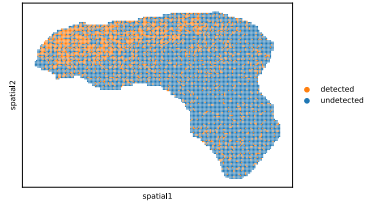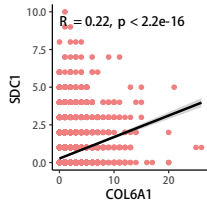

Supplement: s1 [file s1]

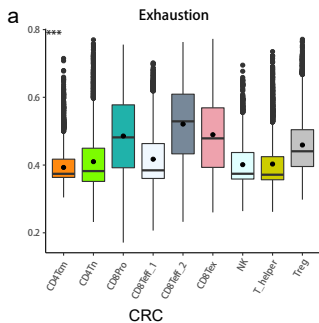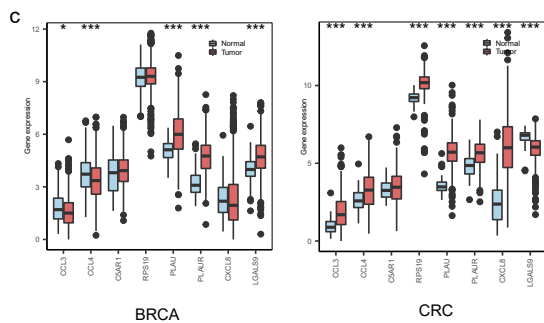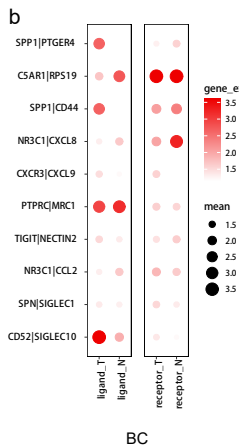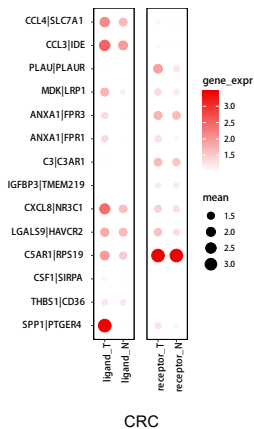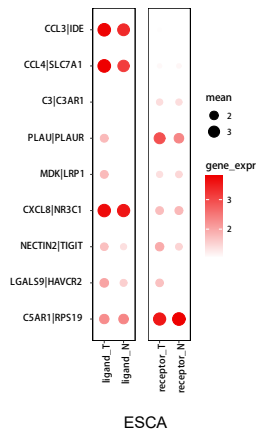

Supplement: s1 [file s1]

a

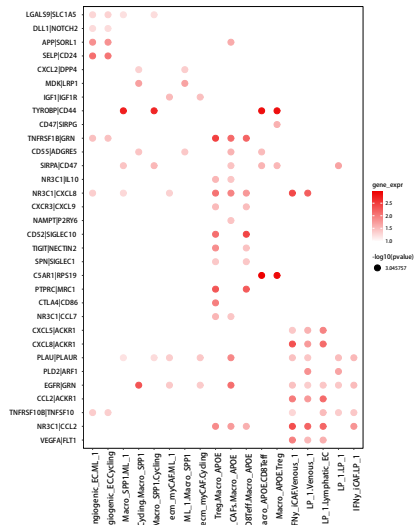

BC

b

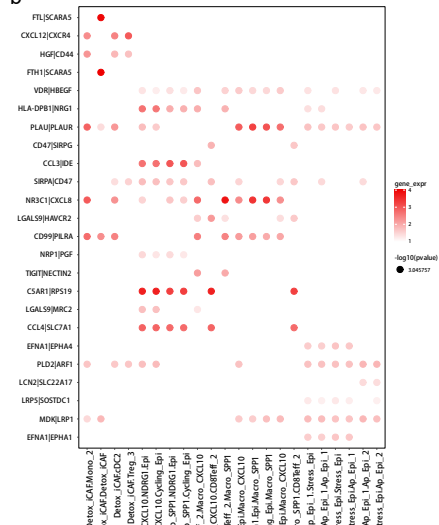

ESCA

c

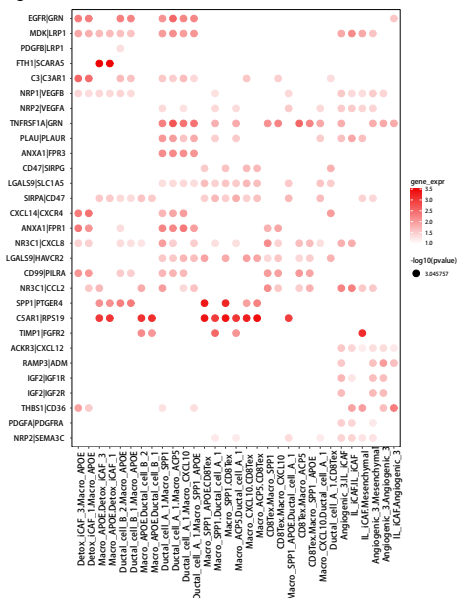

PDAC

d

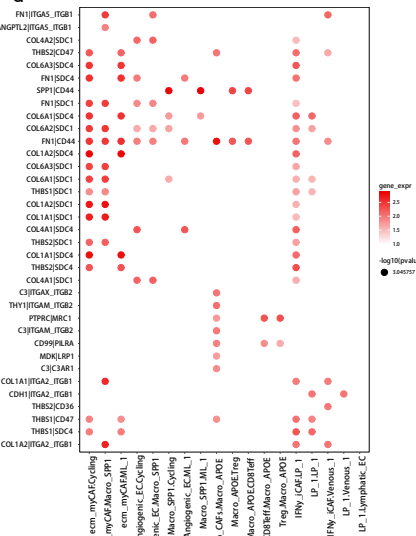

BC

e

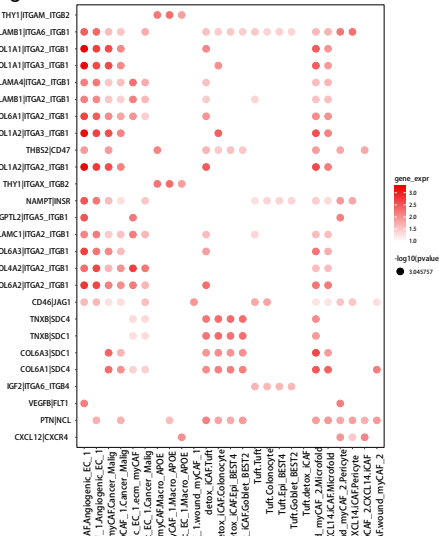

CRC

f

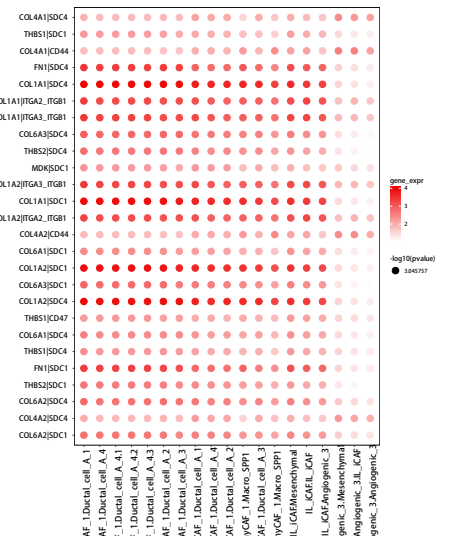

PDAC

Supplement: s1 [file s1]

a

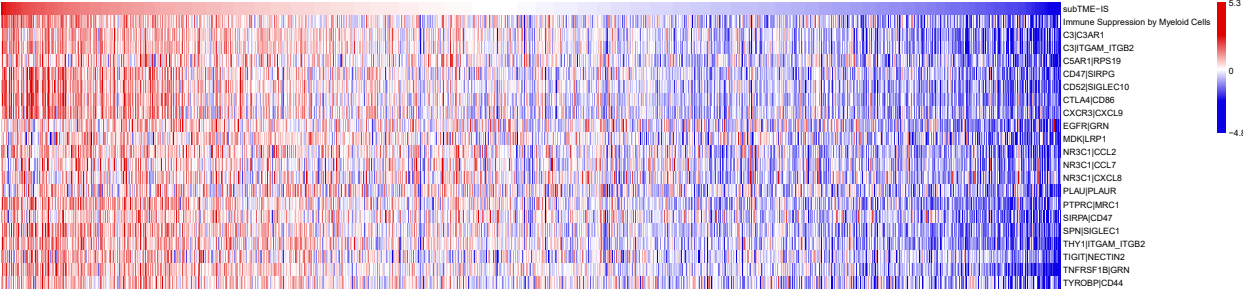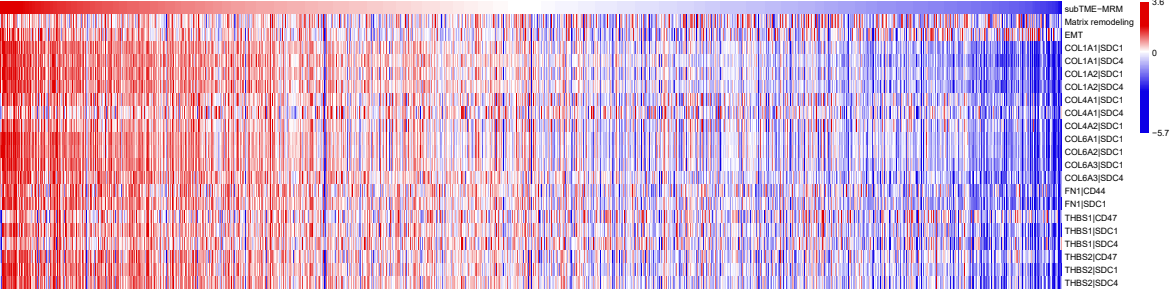

BC

b

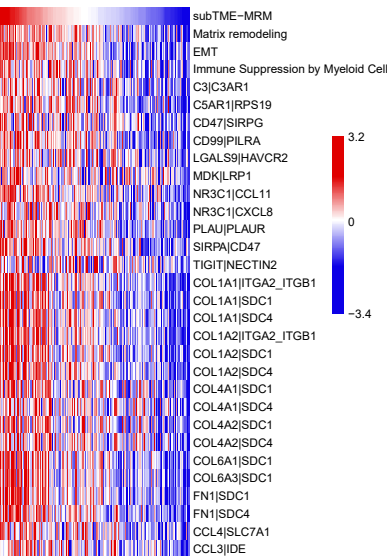

ESCA

c

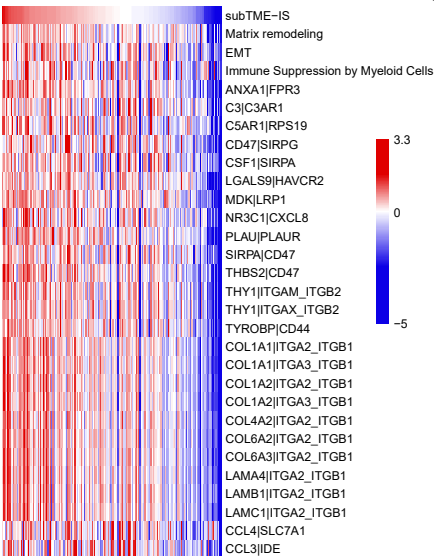

PDAC

d

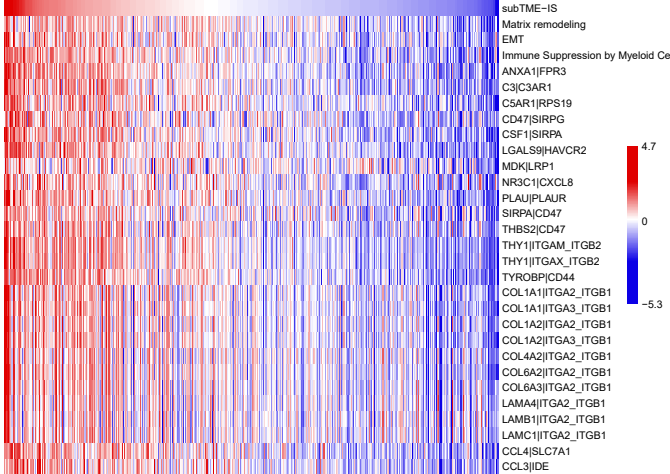

CRC

Supplement: s1 [file s1]

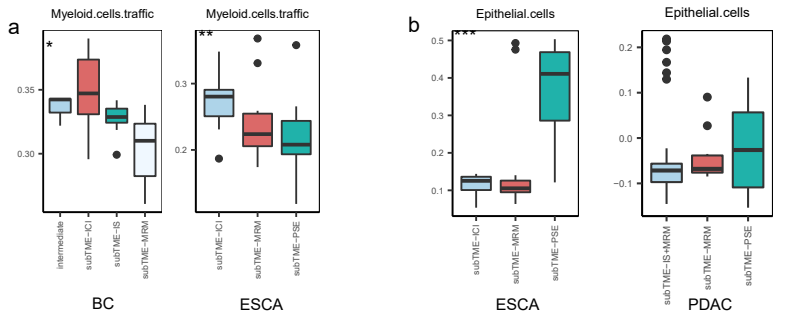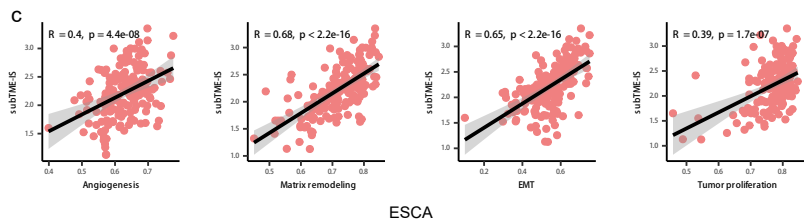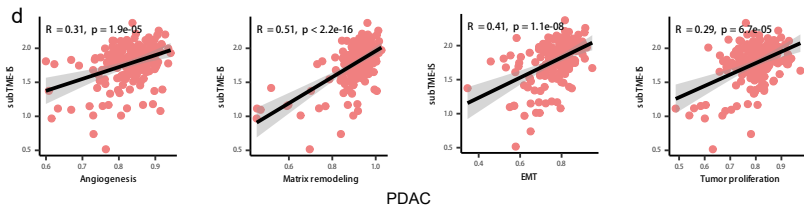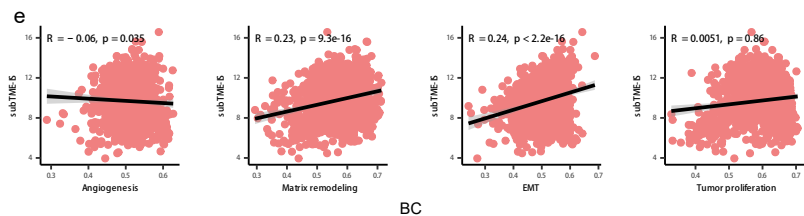

Supplement: s1 [file s1]

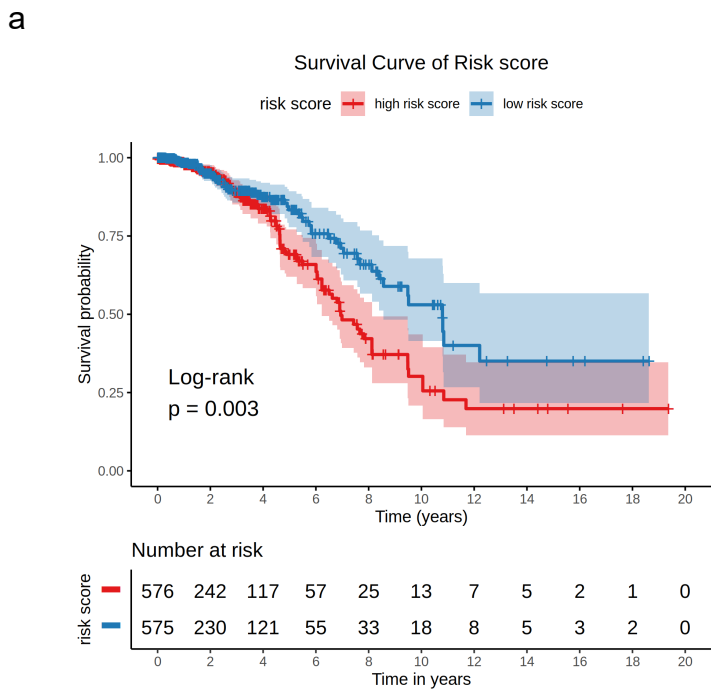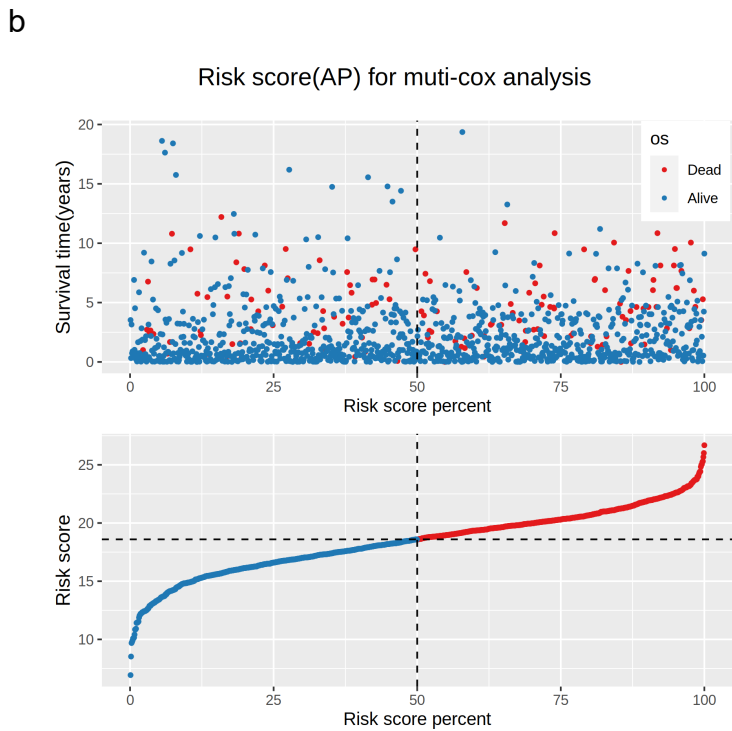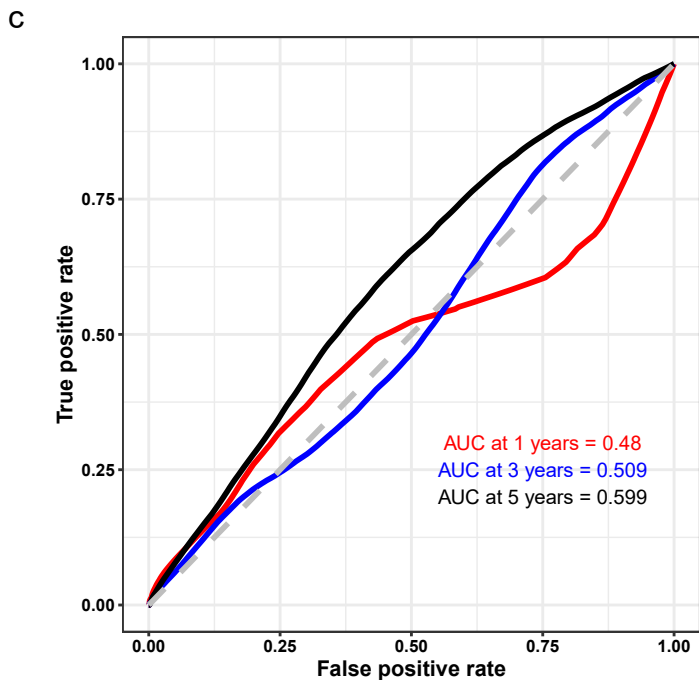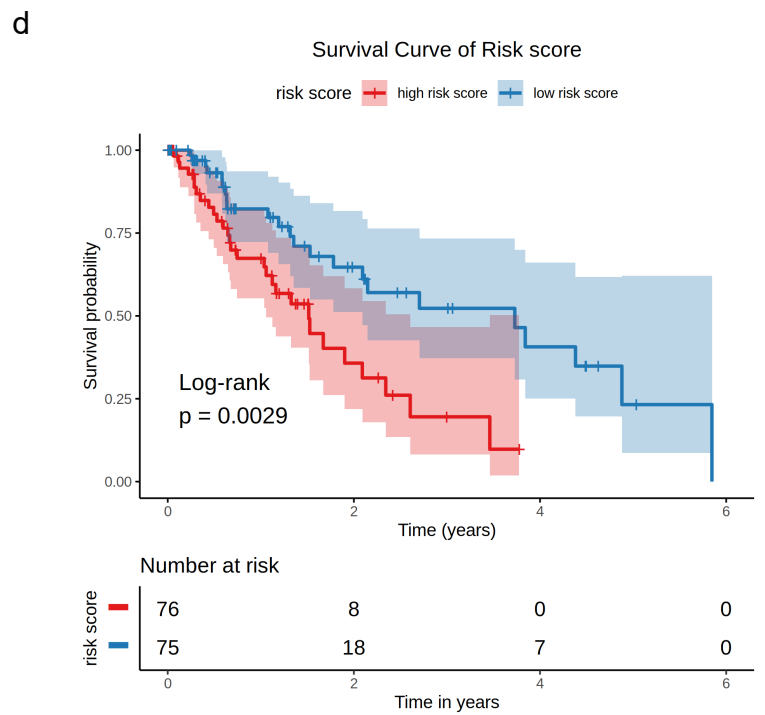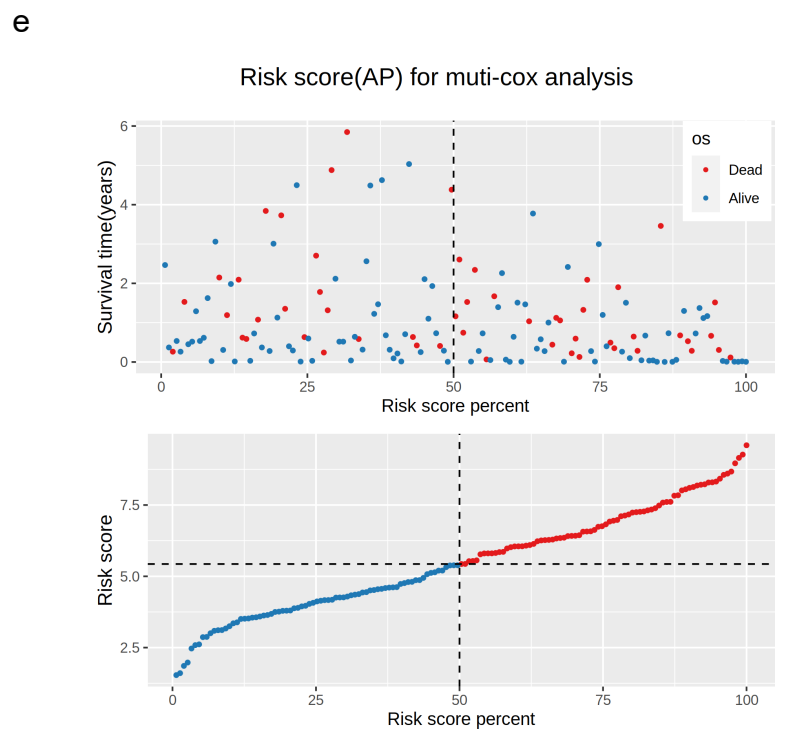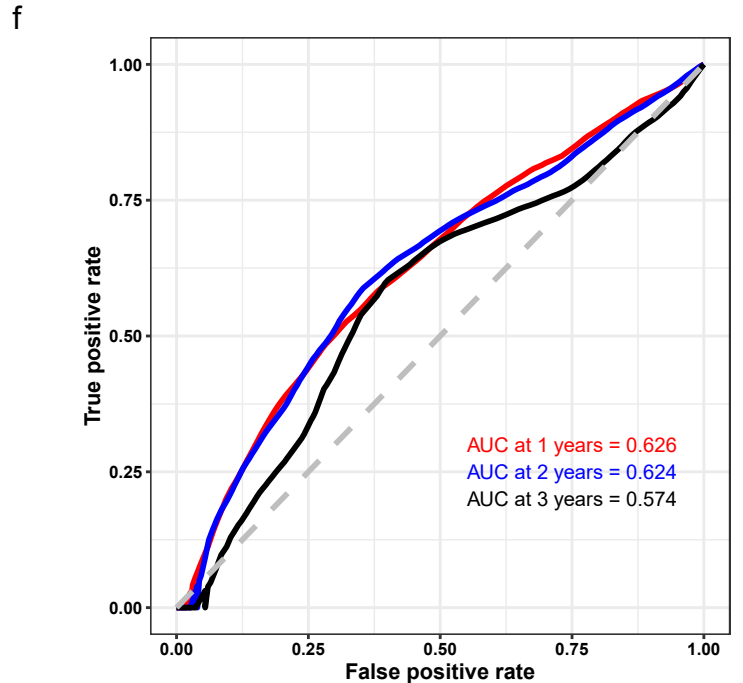

Supplement: s1 [file s1]

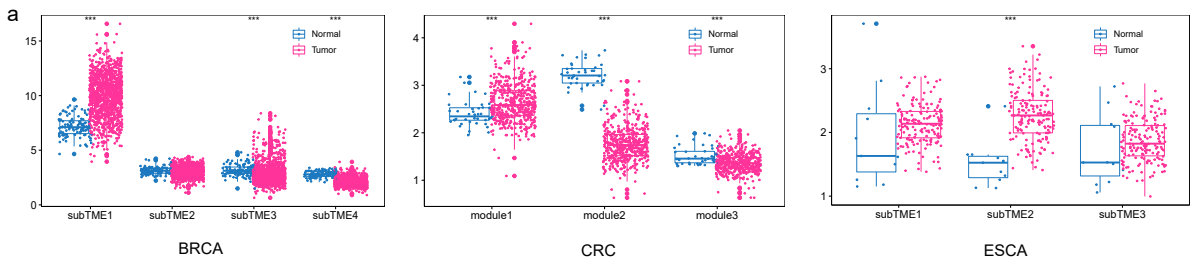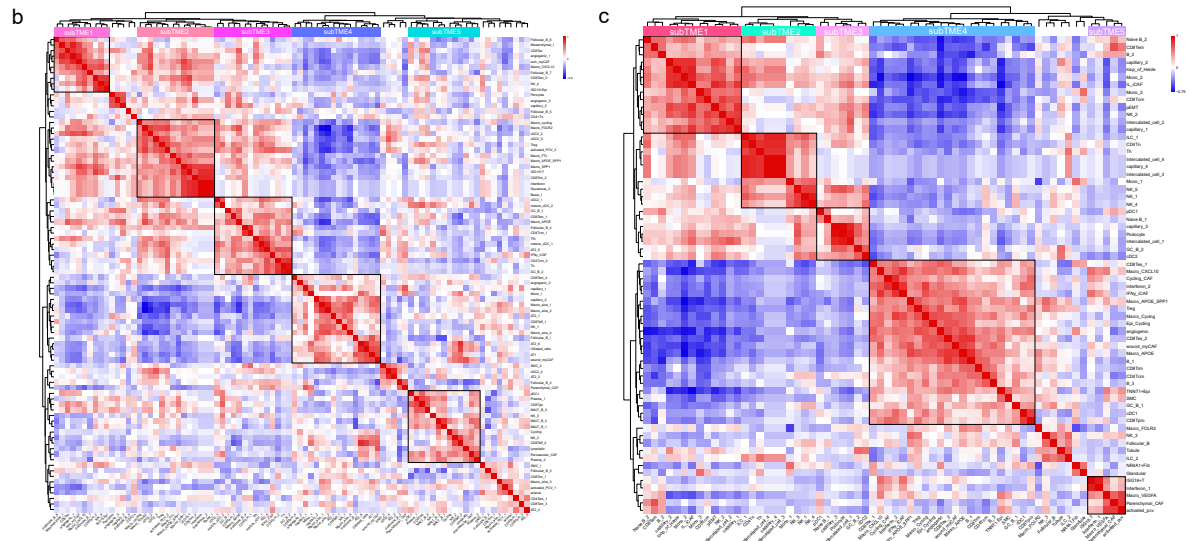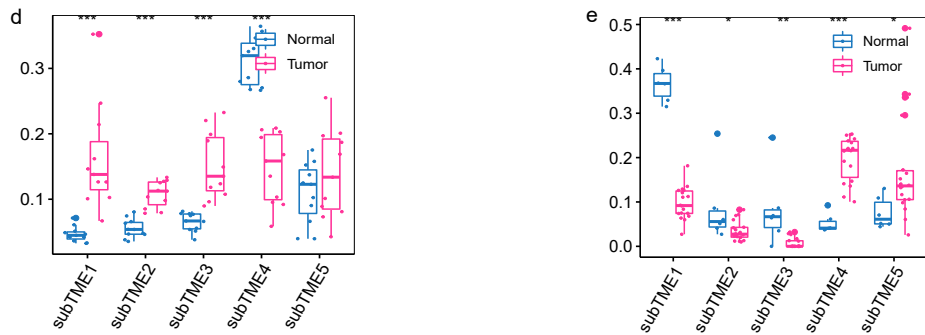

Supplement: s1 [file s1]
